# Supplementary material
Source: PubMed Central journal article supplement (PMC2646257)

## Supporting information:

### **Single-step High-yield Radiosynthesis and Evaluation of a Sensitive $^{18}\text{F}$ -Labeled Ligand for Imaging Brain Peripheral Benzodiazepine Receptors with PET**

Emmanuelle Briard, Sami S. Zoghbi, Fabrice G. Siméon, Masao Imaizumi, Jonathan P. Gourley, H. Umesha Shetty, Shuiyu Lu, Masahiro Fujita, Robert B. Innis and Victor W. Pike

Contents: HPLC analyses of compounds **8–9**.

Analysis conditions for compounds **8** and **11**: Luna hexyl-phenyl column (3  $\mu\text{m}$ , 150  $\times$  4.6 mm; Phenomenex, Torrance, CA) eluted with 10 mM  $\text{HCOONH}_4$  in 60% MeCN (aq.) at 1.0 mL/min with eluate monitored for absorbance at 230 nm. Analysis conditions for compounds **10** and **11**: Luna hexyl-phenyl column (3  $\mu\text{m}$ , 150  $\times$  4.6 mm) eluted with MeCN-25 mM  $\text{HCOONH}_4$  (50: 50 v/v) at 1.0 mL/min with eluate monitored for absorbance at 230 nm.

A. HPLC chromatogram for compound **8**:

**230 nm**

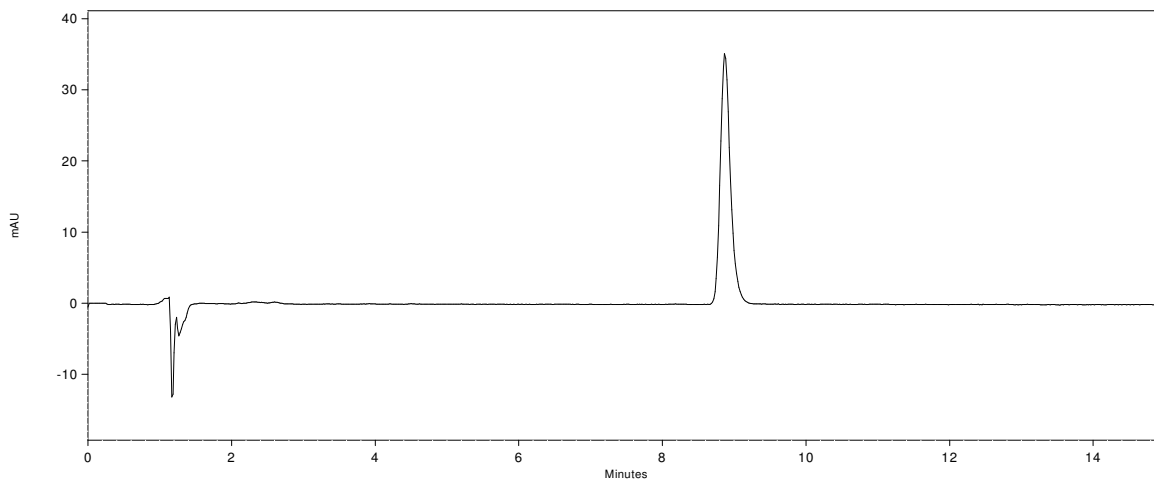

B. HPLC Chromatogram for compound **9**:

**230 nm**

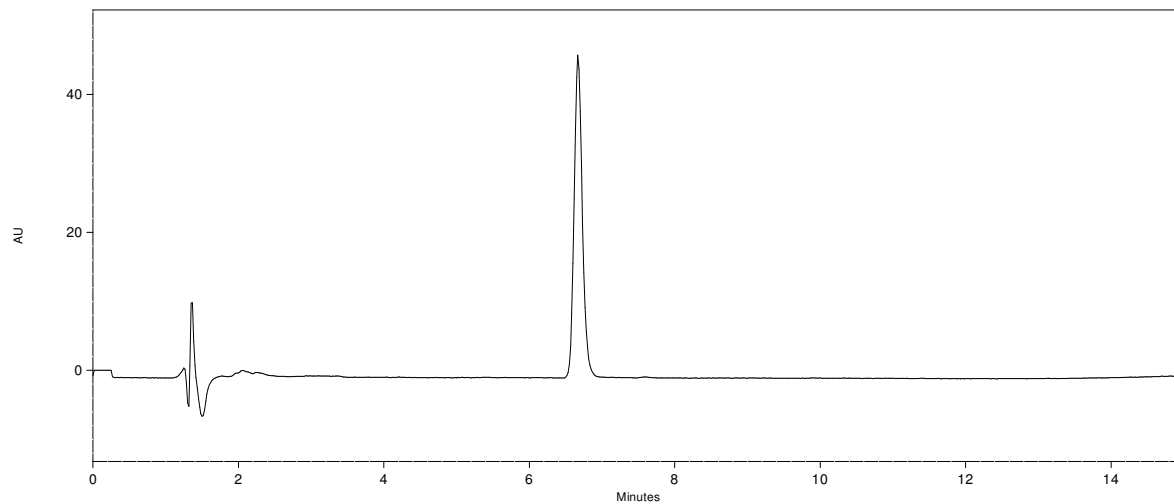

C. HPLC Chromatogram for compound **10**

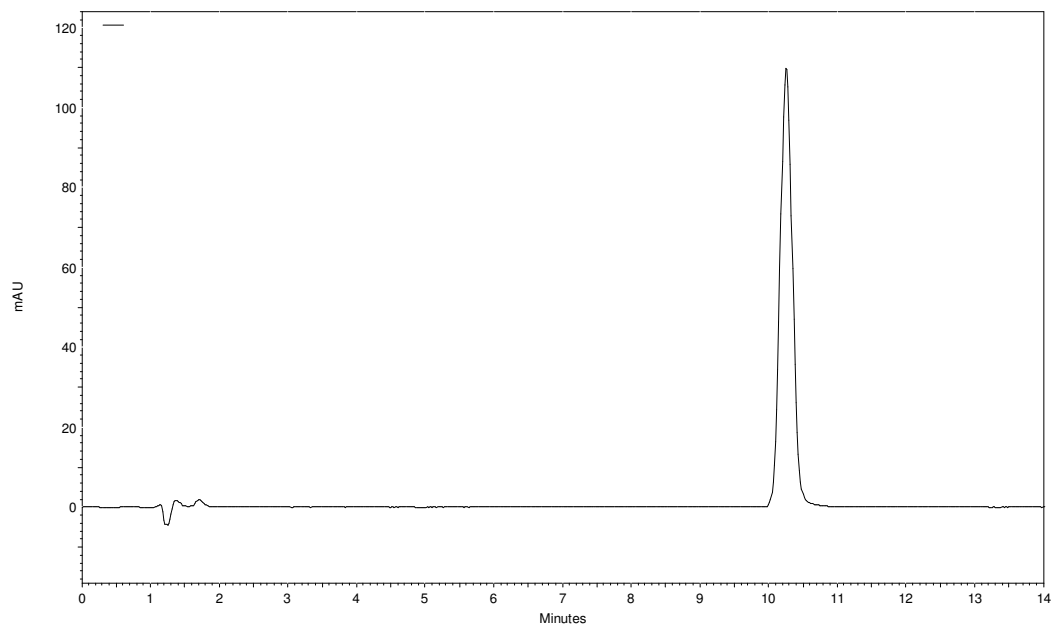

D. HPLC chromatogram for **11**

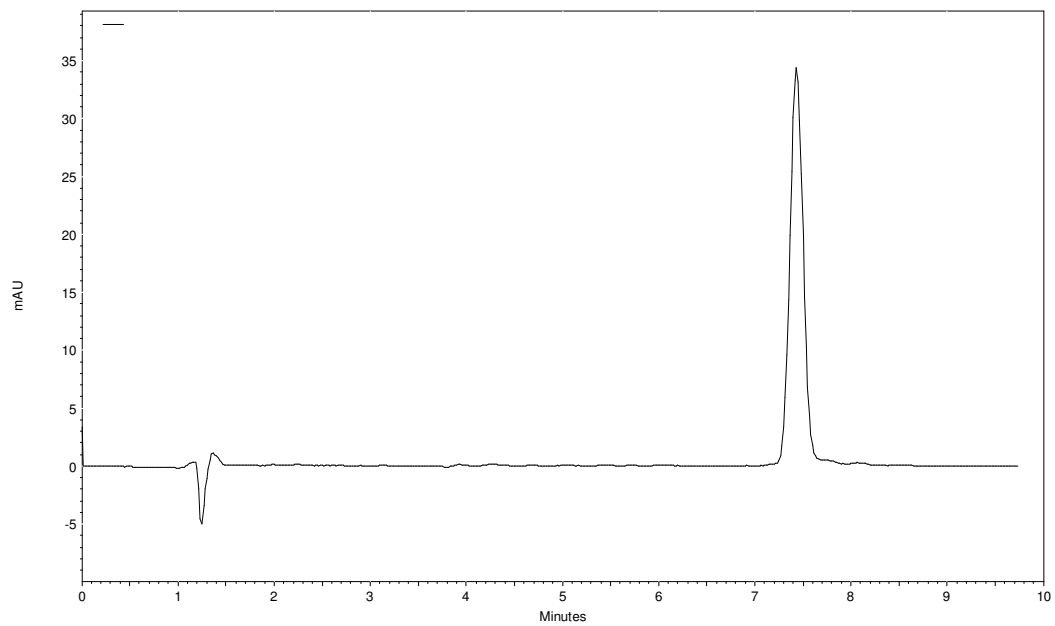

Supplement: NIHMS91386-supplement-1_si_001.pdf [file NIHMS91386-supplement-1_si_001.pdf]
